# Supplementary material for: To Measure or Not to Measure: Direct Oral Anticoagulant Laboratory Assay Monitoring in Clinical Practice
Source: Adv Hematol. 2023 Feb 22;2023:9511499. doi: 10.1155/2023/9511499 (PMC9977549; doi:10.1155/2023/9511499)
Supplement: Supplementary Materials — Table 1: Mean, median, and range of levels. Table 2: Percentage of levels in and out of range. Figure 1: Rivaroxaban levels with a 20 mg daily dose. Figure 2: Apixaban levels in all doses. Figure 3: Apixaban DOAC levels plotted against renal function. Figure 4: Rivaroxaban DOAC levels plotted against renal function. [file 9511499.f1.zip]

Archive with 2 entries (2 files):
- SuppFigAdvHeme (1).docx
- Supplementary TablesAdvHeme.docx
